# Supplementary material for: Insight into the crystal structure and photoluminescence properties of an extremely broadband yellow-emitting phosphor Sr8MgCe(PO4)7:Eu2+
Source: Royal Society of Chemistry journal article supplement (doi:10.1039/d0dt03889j), 2020-12-12
Supplement: d0dt03889j1.pdf [file d0dt03889j1.pdf]

Insight into the crystal structure and photoluminescence  
properties of an extremely broad-band yellow-emitting phosphor

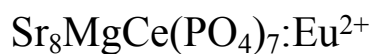

Yanyan Zhou<sup>a</sup>, Yanyan Li<sup>a\*</sup>, Haoyang Wu<sup>a</sup>, Xiang Li<sup>a</sup>, Shuaishuai Yu<sup>a</sup>, Junxiao Wu<sup>a</sup>,  
Wenji Wang<sup>b\*</sup>, and Lei Zhao<sup>a\*</sup>

<sup>a</sup> *Collaborative Innovation Center of Rare-Earth Optical Functional Materials and Devices  
Development, School of Physics and Opto-Electronic Technology, Baoji University of Arts and  
Sciences, Baoji, Shaanxi 721016, P. R. China*

<sup>b</sup> *College of chemistry and chemical engineering, Lanzhou University, Lanzhou, 730000, P. R.  
China*

\*Address correspondence to E-mail: [shuishouly@126.com](mailto:shuishouly@126.com); [wwj@lzu.edu.cn](mailto:wwj@lzu.edu.cn);

[zhaoleibjwl@163.com](mailto:zhaoleibjwl@163.com).

## Supporting Information

Table S1 Bond lengths (Å) for M-O and Ce-O.

| Bond   | Length | Bond    | Length | Bond    | Length | Bond    | Length |
|--------|--------|---------|--------|---------|--------|---------|--------|
| M1-O12 | 2.5215 | M2-O4   | 2.598  | M3-O2   | 3.5777 | Sr5-O13 | 2.5693 |
| M1-O3  | 2.5279 | M2-O6   | 2.6219 | Sr4-O8  | 2.4683 | Sr5-O4  | 2.5586 |
| M1-O8  | 2.5505 | M2-O14  | 2.6356 | Sr4-O8  | 2.5784 | Sr5-O3  | 2.6527 |
| M1-O7  | 2.641  | M2-O12  | 2.6471 | Sr4-O12 | 2.5843 | Sr5-O11 | 2.6735 |
| M1-O13 | 2.6502 | Sr3-O5  | 2.5446 | Sr4-O10 | 2.5978 | Sr5-O3  | 3.0173 |
| M1-O14 | 2.6794 | Sr3-O7  | 2.5454 | Sr4-O11 | 2.6475 | Sr5-O10 | 3.0437 |
| M1-O2  | 2.707  | Sr3-O9  | 2.5463 | Sr4-O12 | 2.6843 | Ce-O14  | 2.1178 |
| M1-O9  | 2.7307 | Sr3-O11 | 2.5833 | Sr4-O10 | 2.9944 | Ce-O14  | 2.1178 |
| M1-O1  | 2.8401 | Sr3-O8  | 2.6065 | Sr4-O11 | 3.0231 | Ce-O6   | 2.1372 |
| M2-O2  | 2.5106 | Sr3-O6  | 2.6081 | Sr4-O2  | 3.0425 | Ce-O6   | 2.1372 |
| M2-O10 | 2.5194 | Sr3-O1  | 2.6298 | Sr5-O7  | 2.526  | Ce-O9   | 2.1381 |
| M2-O13 | 2.5254 | Sr3-O5  | 2.6527 | Sr5-O5  | 2.5468 | Ce-O9   | 2.1381 |
| M2-O4  | 2.5561 | Sr3-O1  | 3.0734 | Sr5-O1  | 2.5546 |         |        |
